# Supplementary material for: Olaparib-Resistant BRCA2MUT Ovarian Cancer Cells with Restored BRCA2 Abrogate Olaparib-Induced DNA Damage and G2/M Arrest Controlled by the ATR/CHK1 Pathway for Survival
Source: MDPI journal article supplement (doi:10.3390/cells12071038), 2023-03-29
Supplement: s1 [file s1]

# Supplementary Information

## Olaparib-Resistant *BRCA2*<sup>MUT</sup> Ovarian Cancer Cells with Restored *BRCA2* Abrogate Olaparib-Induced DNA Damage and G2/M Arrest Controlled by the ATR/CHK1 Pathway for Survival

Łukasz Biegała, Arkadiusz Gajek, Agnieszka Marczak, Aneta Rogalska \*

### Supplementary Figure S1 (Figure S1)

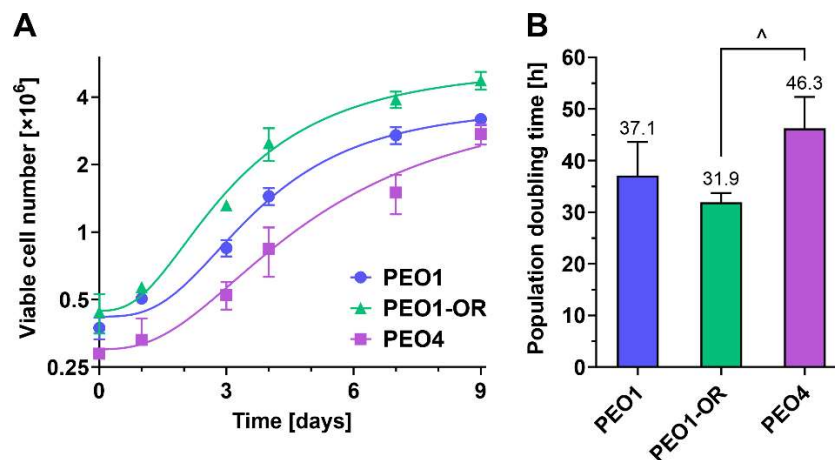

**Figure S1. Growth curves and population doubling times for ovarian cancer (OC) cell lines.** Cells seeded in 6-well plates were cultured up to 9 days and periodically subjected to endpoint counting from individual wells to determine the number of viable cells using trypan blue exclusion assay. **(A)** Growth curves of OC cell lines cultured under optimal conditions for 9 days. The results are shown as mean  $\pm$  SD ( $n = 3$ ). **(B)** Population doubling times of OC cell lines estimated in populations exhibiting exponential growth (days 2 – 5). Ordinary one-way ANOVA followed by Tukey's multiple comparison test was used to compare population doubling times between cell line: ^ $p < 0.05$  statistically significant.

## Supplementary Figure S2 (Figure S2)

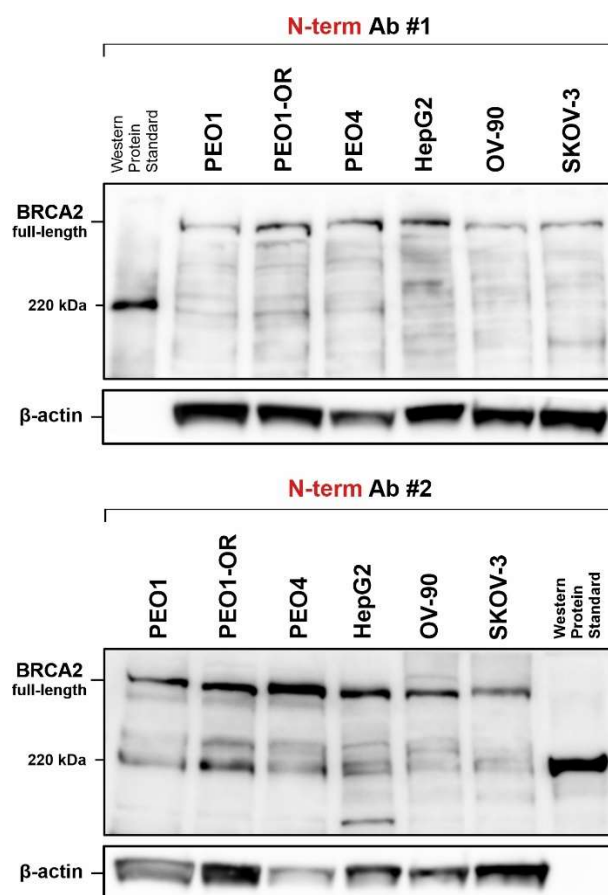

**Figure S2. Qualitative western blot analysis of full-length and truncated BRCA2 in PEO1, PEO1-OR, and PEO4 ovarian cancer (OC) cell lines.** HepG2, OV-90, and SKOV-3 cell lines were used as negative controls of truncated BRCA2 expression. Whole-cell lysates (30  $\mu$ g of protein) were loaded into each lane and separated using 8% Bis-Tris gels by SDS-PAGE. Two various antibodies targeting different epitopes within N-terminus of the protein were used for immunodetection to confirm obtained results (N-term Ab #1 and #2). Sharp band from a western protein standard (MagicMark™ XP Western Protein Standard, Thermo Fisher Scientific) corresponds to the protein molecular weight of 220 kDa. Truncated form of BRCA2 (calculated molecular weight of 186 kDa) was undetectable.

# Supplementary Figure S3 (Figure S3)

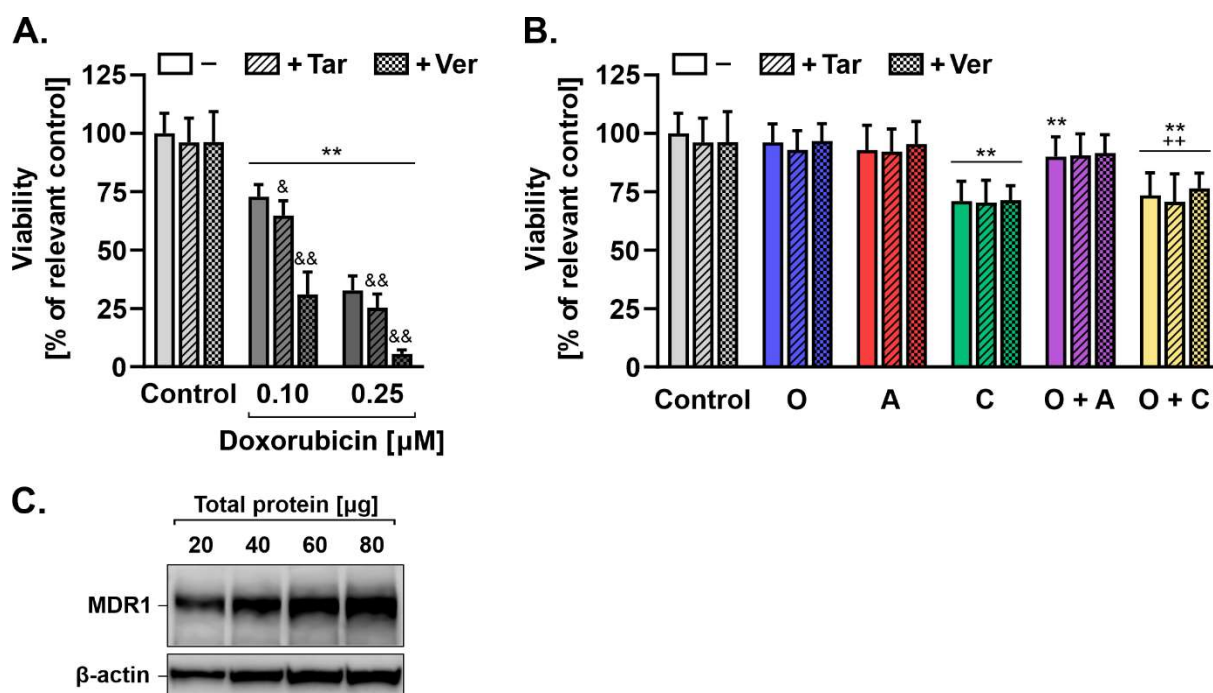

**Figure S3. Effect of MDR1 inhibition with tariquidar (Tar) or verapamil (Ver) on cytotoxicity of a MDR1 substrate doxorubicin and olaparib, ATRi, CHK1i, or their combinations after 48 h of treatment in HepG2 cell line and qualitative western blot analysis of MDR1 expression in untreated HepG2 cells.** Cell viability was assessed by MTT assay after treatment with (A) doxorubicin or (B) olaparib, ATRi, CHK1i, or their combinations, and expressed as the percentage of relevant control cells (untreated control for cells treated with tested drugs only; control with tariquidar or verapamil for cells treated with tested drugs and a relevant MDR1 inhibitor). Briefly, HepG2 cells were pre-treated with MDR inhibitors for 1 h (0.1  $\mu$ M Tar or 50  $\mu$ M Ver) following incubation with olaparib (O, 5  $\mu$ M), ATRi (A, 0.5  $\mu$ M), CHK1i (C, 2.5  $\mu$ M) or their combinations in the absence and presence of MDR1 inhibitors. Co-treatment of tariquidar (0.1  $\mu$ M, striped bars) or verapamil (50  $\mu$ M, checked bars) with doxorubicin (0.10  $\mu$ M and 0.25  $\mu$ M) was used as a positive control of enhanced cytotoxicity of a known MDR1 substrate due to MDR1 inhibition. Data was expressed as mean  $\pm$  SD (n = 3–4). Welch's ANOVA followed by Dunnett T3 multiple comparison test was used to compare viability of each group (with unequal variances) in response to the treatments: \* $p$  < 0.05, \*\* $p$  < 0.01 treatment vs. control without MDR1 inhibitor;  $\&p$  < 0.05,  $\&p$  < 0.01 treatment vs. treatment with MDR1 inhibitor (tariquidar or verapamil). (C) Qualitative western blot analysis of MDR1 expression in untreated HepG2 cells confirming protein expression in the cells.

**Supplementary Figure S4 (Figure S4)**

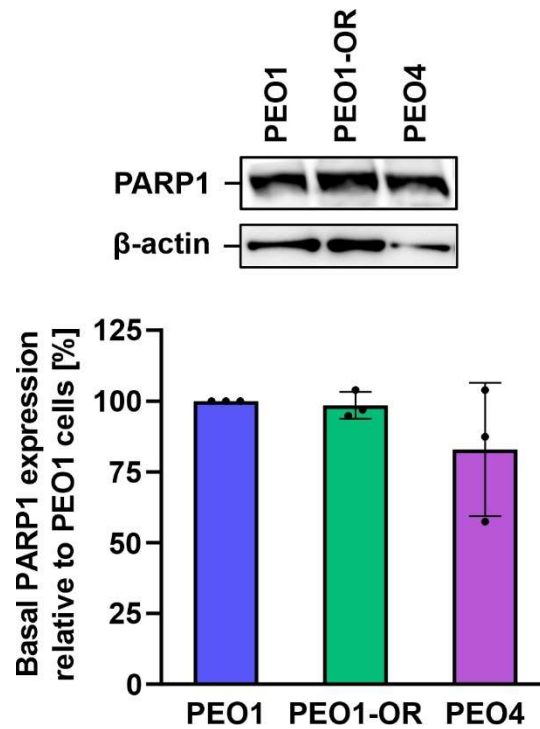

**Figure S4. Quantitative western blot analysis of PARP1 basal expression in untreated PEO1, PEO1-OR, and PEO4 ovarian cancer (OC) cell lines with a representative blot.** Whole-cell lysates (30  $\mu$ g of protein) were loaded into each lane and separated in 8% Bis-Tris gels by SDS-PAGE following protein transfer and immunodetection. The results are shown as mean  $\pm$  SD (n = 3). Individual data points are shown in bar charts presenting basal expression levels. Ordinary one-way ANOVA followed by Tukey's multiple comparison test was used to compare basal protein expression between cell lines:  $^{\wedge}p < 0.05$ ,  $^{\wedge\wedge}p < 0.01$  differences between cell lines.

### **Supplementary Table S1 (Table S1)**

#### **Key materials and reagents used in the study.**

| <b>Reagent</b>                                               | <b>Catalogue Number</b> | <b>Manufacturer</b>                      |
|--------------------------------------------------------------|-------------------------|------------------------------------------|
| (±)-Verapamil HCl                                            | V4629                   | Sigma-Aldrich (Merk)                     |
| BD Pharmingen™ FITC BrdU Flow Kit                            | 557891                  | BD Biosciences                           |
| Colcemid                                                     | 10295892001             | Roche (Merck)                            |
| Crystal violet                                               | 911517ZA                | VWR                                      |
| DMEM, high glucose (4.5 g/L),<br>GlutaMAX™ Supplement, HEPES | 32430-027               | Gibco (Thermo Fisher Scientific)         |
| Doxorubicin HCl                                              | SRP04600d               | Sequoia Research Products<br>Limited     |
| FBS, heat-inactivated, qualified                             | 10270106                | Gibco (Thermo Fisher Scientific)         |
| GenElute™ Mammalian Genomic DNA<br>Miniprep Kits             | G1N10                   | Sigma-Aldrich (Merk)                     |
| Giemsa Dilution Buffer (20X)                                 | 1062.3                  | AQUA-MED                                 |
| Giemsa Stain (10X)                                           | 1020.1                  | AQUA-MED                                 |
| Halt™ Phosphatase Inhibitor Cocktail<br>(100X)               | 78420                   | Thermo Fisher Scientific                 |
| Halt™ Protease Inhibitor Cocktail<br>(100X)                  | 87786                   | Thermo Fisher Scientific                 |
| HiMark™ Pre-stained Protein Standard                         | LC5699                  | Invitrogen (Thermo Fisher<br>Scientific) |
| MagicMark™ XP Western Protein<br>Standard                    |                         | Invitrogen (Thermo Fisher<br>Scientific) |
| MOPS Running Buffer                                          | MPM0PS                  | Millipore (Merck)                        |
| mPAGE® 4X LDS Sample Buffer                                  | MPSB                    | Millipore (Merck)                        |
| mPAGE® Bis-Tris Precast Gels 10%                             | MP10W10                 | Millipore (Merck)                        |
| mPAGE® Bis-Tris Precast Gels 12%                             | MP12W10                 | Millipore (Merck)                        |
| mPAGE® Bis-Tris Precast Gels 8%                              | MP8W10                  | Millipore (Merck)                        |
| mPAGE® Transfer Buffer                                       | MPTRB                   | Millipore (Merck)                        |
| MTT                                                          | 20395.03                | SERVA Electrophoresis                    |
| Pierce™ Detergent Compatible Bradford                        | 23246                   | Thermo Fisher Scientific                 |
| PVDF Membrane                                                | IPVH85R                 | Millipore (Merck)                        |
| RIPA Lysis and Extraction Buffer                             | 89900                   | Thermo Fisher Scientific                 |
| RPMI 1640, GlutaMAX™ Supplement,<br>HEPES                    | 72400-021               | Gibco (Thermo Fisher Scientific)         |
| Spectra™ Multicolor Broad Range<br>Protein Ladder            | 26634                   | Thermo Fisher Scientific                 |
| Spectra™ Multicolor High Range<br>Protein Ladder             | 26625                   | Thermo Fisher Scientific                 |
| SuperBlock™ (TBS) Blocking Buffer                            | 37581                   | Thermo Fisher Scientific                 |
| SuperSignal™ West Atto Ultimate<br>Sensitivity Substrate     | A38555                  | Thermo Fisher Scientific                 |

|                                                           |          |                                  |
|-----------------------------------------------------------|----------|----------------------------------|
| SuperSignal™ West Pico PLUS<br>Chemiluminescent Substrate | 34577    | Thermo Fisher Scientific         |
| Tarividar                                                 | SML1790  | Sigma-Aldrich (Merk)             |
| Trypsin-EDTA                                              | 25200072 | Gibco (Thermo Fisher Scientific) |
| β-mercaptoethanol                                         | M6250    | Sigma-Aldrich (Merck)            |

### **Supplementary Table S2 (Table S2)**

**Primary antibodies used in the study.**

| <b>Target</b>     | <b>Host and Clonality</b> | <b>Supplier</b>                       | <b>Catalogue Number</b> | <b>Dilution</b> | <b>Dilution buffer</b>  | <b>Blocking agent</b>             | <b>Application</b> |
|-------------------|---------------------------|---------------------------------------|-------------------------|-----------------|-------------------------|-----------------------------------|--------------------|
| 53BP1             | Mouse monoclonal          | Sigma-Aldrich (Merck)                 | MAB3802                 | 1:1000          | 5% BSA in TBST          | SuperBlock™ (TBS) Blocking Buffer | WB                 |
| ATR               | Mouse monoclonal          | Invitrogen (Thermo Fisher Scientific) | MA1-23158               | 1:1000          | 5% BSA in TBST          | 5% non-fat milk in TBST           | WB                 |
| BRCA1             | Rabbit polyclonal         | Cell Signaling Technology             | 9010                    | 1:1000          | 5% BSA in TBST          | SuperBlock™ (TBS) Blocking Buffer | WB                 |
| BRCA2 (N-term) #1 | Rabbit polyclonal         | Thermo Fisher Scientific              | A303-434A               | 1:10 000        | 5% non-fat milk in TBST | SuperBlock™ (TBS) Blocking Buffer | WB                 |
| BRCA2 (N-term) #2 | Mouse monoclonal          | Invitrogen (Thermo Fisher Scientific) | MA523942                | 1:1000          | 5% non-fat milk in TBST | SuperBlock™ (TBS) Blocking Buffer | WB                 |
| BRCA2 (C-term)    | Rabbit polyclonal         | Thermo Fisher Scientific              | A300-005A               | 1:1000          | 5% BSA in TBST          | SuperBlock™ (TBS) Blocking Buffer | WB                 |
| CHK1              | Rabbit monoclonal         | Thermo Fisher Scientific              | MA5-32180               | 1:1000          | 5% BSA in TBST          | 5% non-fat milk in TBST           | WB                 |
| MDR1              | Rabbit monoclonal         | Invitrogen (Thermo Fisher Scientific) | MA5-32282               | 1:1000          | 5% BSA in TBST          | SuperBlock™ (TBS) Blocking Buffer | WB                 |
| PARG              | Mouse monoclonal          | Invitrogen (Thermo Fisher Scientific) | MA5-27034               | 1:1000          | 5% BSA in TBST          | SuperBlock™ (TBS) Blocking Buffer | WB                 |

| Target         | Host and Clonality | Supplier                              | Catalogue Number | Dilution                  | Dilution buffer | Blocking agent                                               | Application |
|----------------|--------------------|---------------------------------------|------------------|---------------------------|-----------------|--------------------------------------------------------------|-------------|
| PARP1          | Rabbit monoclonal  | Cell Signaling Technology             | 9532             | 1:1000                    | 5% BSA in TBST  | 5% non-fat milk in TBST                                      | WB          |
| pATR (Thr1989) | Rabbit monoclonal  | Cell Signaling Technology             | 30632            | 1:1000                    | 5% BSA in TBST  | 5% non-fat milk in TBST                                      | WB          |
| pCHK1 (Ser345) | Rabbit monoclonal  | Cell Signaling Technology             | 2348             | 1:1000                    | 5% BSA in TBST  | 5% non-fat milk in TBST                                      | WB          |
| RAD51          | Rabbit polyclonal  | Sigma-Aldrich (Merck)                 | ABE257           | 1:1000 (WB)<br>1:500 (IF) | 5% BSA in TBST  | SuperBlock™ (TBS) Blocking Buffer                            | WB, IF      |
| β-actin        | Mouse monoclonal   | Sigma-Aldrich (Merck)                 | A1978            | 1:10 000                  | 5% BSA in TBST  | 5% non-fat milk in TBST or SuperBlock™ (TBS) Blocking Buffer | WB          |
| γH2AX (Ser139) | Mouse monoclonal   | Sigma-Aldrich (Merck)                 | 05-636           | 1:1000 (WB)<br>1:500 (IF) | 5% BSA in TBST  | SuperBlock™ (TBS) Blocking Buffer                            | WB, IF      |
| γH2AX (Ser139) | Mouse monoclonal   | Invitrogen (Thermo Fisher Scientific) | 12-9865-42       | 1:20                      | N/A             | 1X BD Perm/Wash Buffer                                       | FC          |

### Supplementary Table S3 (Table S3)

Secondary antibodies used in the study.

| Species Reactivity | Conjugate             | Host | Manufacturer                          | Catalogue Number | Dilution | Dilution buffer                           | Application |
|--------------------|-----------------------|------|---------------------------------------|------------------|----------|-------------------------------------------|-------------|
| Mouse              | HRP                   | Goat | Invitrogen (Thermo Fisher Scientific) | A28177           | 1:10 000 | 5% non-fat milk in TBST                   | WB          |
| Rabbit             | HRP                   | Goat | Cell Signaling Technology             | 7074             | 1:10 000 |                                           | WB          |
| Mouse              | Alexa Fluor™ Plus 488 | Goat | Invitrogen (Thermo Fisher Scientific) | A32723           | 1:1000   | DPBS 1X with 1% BSA and 0.3% Triton X-100 | IF          |
| Rabbit             | Alexa Fluor® 555      | Goat | Cell Signaling Technology             | 4413             | 1:1000   |                                           | IF          |

### Supplementary Table S4 (Table S4)

High-quality exonic and intronic variants detected in *ABCB1*, *ATR*, *BRCA1*, *BRCA2*, *CHEK1*, *H2AX*, *PARP1*, *PARG*, *RAD51*, *TP53*, and *TP53BP1* genes in PEO1 and PEO1-OR cell lines by whole-exome sequencing.

| Gene  | Mutation                         | Gene region | Variant type | Amino acid change | Type of mutation | Functional impact | Computed pathogenicity | CADD score | Allele fraction [% of total reads] |             | Maximal population allele frequency |                       |
|-------|----------------------------------|-------------|--------------|-------------------|------------------|-------------------|------------------------|------------|------------------------------------|-------------|-------------------------------------|-----------------------|
|       |                                  |             |              |                   |                  |                   |                        |            | PEO1                               | PEO1-OR     |                                     |                       |
| TP53  | c.731G>A                         | CDS         | SNV          | p.G244D           | missense         | loss              | pathogenic             | 27         | 100%<br>(of 83 reads)              | <div></div> | 100%<br>(of 90 reads)               | 0%                    |
|       | c.993+409delT                    | intron      | deletion     | –                 | –                | normal            | benign                 | <10        | 53%<br>(of 19 reads)               | <div></div> | absent                              | 11%<br>(African)      |
| BRCA1 | c.4837A>G                        | CDS         | SNV          | p.S1613G          | missense         | normal            | benign (!)             | <10        | 100%<br>(of 140 reads)             | <div></div> | 100%<br>(of 180 reads)              | 49%<br>(South Asian)  |
|       | c.2082C>T                        | CDS         | SNV          | p.S694S           | synonymous       | normal            | benign                 | <10        | 100%<br>(of 183 reads)             | <div></div> | 100%<br>(of 242 reads)              | 49%<br>(South Asian)  |
|       | c.2311T>C                        | CDS         | SNV          | p.L771L           | synonymous       | normal            | benign                 | <10        | 100%<br>(of 197 reads)             | <div></div> | 100%<br>(of 262 reads)              | 49%<br>(South Asian)  |
|       | c.2612C>T                        | CDS         | SNV          | p.P871L           | missense         | normal            | benign (!)             | 18         | 100%<br>(of 135 reads)             | <div></div> | 100%<br>(of 159 reads)              | 81%<br>(African)      |
|       | c.3113A>G                        | CDS         | SNV          | p.E1038G          | missense         | normal            | benign (!)             | 14         | 100%<br>(of 189 reads)             | <div></div> | 100%<br>(of 240 reads)              | 49%<br>(South Asian)  |
|       | c.3548A>G                        | CDS         | SNV          | p.K1183R          | missense         | normal            | benign (!)             | <10        | 100%<br>(of 190 reads)             | <div></div> | 100%<br>(of 198 reads)              | 49%<br>(South Asian)  |
|       | c.4308T>C                        | CDS         | SNV          | p.S1436S          | synonymous       | normal            | benign                 | <10        | 100%<br>(of 120 reads)             | <div></div> | 100%<br>(of 160 reads)              | 49%<br>(South Asian)  |
|       | c.-1074C>G                       | 5' UTR      | SNV          | –                 | –                | normal            | benign                 | <10        | 100%<br>(of 70 reads)              | <div></div> | 100%<br>(of 109 reads)              | 82%<br>(African)      |
|       | c.-134T>C                        | 5' UTR      | SNV          | –                 | –                | normal            | benign                 | <10        | 100%<br>(of 32 reads)              | <div></div> | 100%<br>(of 32 reads)               | 49%<br>(South Asian)  |
|       | c.5468-121delA                   | intron      | deletion     | –                 | –                | normal            | uncertain significance | <10        | 50%<br>(of 20 reads)               | <div></div> | absent                              | 0.40%<br>(East Asian) |
|       | c.4987-144_4987-142dupAAA        | intron      | insertion    | –                 | –                | normal            | likely benign          | <10        | absent                             | <div></div> | 100%<br>(of 23 reads)               | 4%<br>(African)       |
|       | c.134+224delT                    | intron      | deletion     | –                 | –                | normal            | benign                 | <10        | 94%<br>(of 16 reads)               | <div></div> | 95%<br>(of 20 reads)                | 52%<br>(South Asian)  |
|       | c.213-161A>G                     | intron      | SNV          | –                 | –                | normal            | benign                 | <10        | 100%<br>(of 37 reads)              | <div></div> | 100%<br>(of 40 reads)               | 82%<br>(African)      |
|       | c.441+36_441+49delCTTTTCTTTTTTTT | intron      | deletion     | –                 | –                | normal            | benign                 | <10        | 100%<br>(of 68 reads)              | <div></div> | 97%<br>(of 131 reads)               | 49%<br>(South Asian)  |

| Gene  | Mutation                     | Gene region | Variant type | Amino acid change | Type of mutation | Functional impact | Computed pathogenicity | CADD score | Allele fraction [% of total reads] |                                                                                                             | Maximal population allele frequency |
|-------|------------------------------|-------------|--------------|-------------------|------------------|-------------------|------------------------|------------|------------------------------------|-------------------------------------------------------------------------------------------------------------|-------------------------------------|
|       |                              |             |              |                   |                  |                   |                        |            | PEO1                               | PEO1-OR                                                                                                     |                                     |
|       | c.441+64delT                 | intron      | deletion     | –                 | –                | normal            | benign                 | <10        | 100%<br>(of 65 reads)              |  94%<br>(of 126 reads)   | 75%<br>(African)                    |
|       | c.547+146A>T                 | intron      | SNV          | –                 | –                | normal            | benign                 | <17        | 100%<br>(of 25 reads)              | 100%<br>(of 25 reads)                                                                                       | 49%<br>(South Asian)                |
|       | c.548-58delT                 | intron      | deletion     | –                 | –                | normal            | benign                 | <12        | 100%<br>(of 93 reads)              | 100%<br>(of 89 reads)                                                                                       | 49%<br>(South Asian)                |
|       | c.593+167T>C                 | intron      | SNV          | –                 | –                | normal            | benign                 | <10        | 100%<br>(of 34 reads)              | 100%<br>(of 49 reads)                                                                                       | 49%<br>(South Asian)                |
|       | c.4097-141A>C                | intron      | SNV          | –                 | –                | normal            | benign                 | <10        | 100%<br>(of 41 reads)              | 100%<br>(of 67 reads)                                                                                       | 67%<br>(African)                    |
|       | c.4357+117G>A                | intron      | SNV          | –                 | –                | normal            | benign                 | <10        | 100%<br>(of 19 reads)              | 100%<br>(of 45 reads)                                                                                       | 12%<br>(South Asian)                |
|       | c.4358-2885G>A               | intron      | SNV          | –                 | –                | normal            | benign                 | <10        | 100%<br>(of 109 reads)             | 100%<br>(of 150 reads)                                                                                      | 49%<br>(South Asian)                |
|       | c.4358-2590T>G               | intron      | SNV          | –                 | –                | normal            | benign                 | <10        | 100%<br>(of 18 reads)              | 100% (LQ)<br>(of 24 reads)                                                                                  | 49%<br>(South Asian)                |
|       | c.4485-203_4485-199 delAACCC | intron      | deletion     | –                 | –                | normal            | benign                 | <10        | 100%<br>(of 12 reads)              | 100%<br>(of 7 reads)                                                                                        | 49%<br>(South Asian)                |
|       | c.4485-137T>A                | intron      | SNV          | –                 | –                | normal            | benign                 | <10        | 100%<br>(of 29 reads)              | 100%<br>(of 23 reads)                                                                                       | 69%<br>(African)                    |
|       | c.4485-63C>G                 | intron      | SNV          | –                 | –                | normal            | benign                 | <10        | 100%<br>(of 62 reads)              | 100%<br>(of 63 reads)                                                                                       | 49%<br>(South Asian)                |
|       | c.4987-92A>G                 | intron      | SNV          | –                 | –                | normal            | benign                 | <10        | 100%<br>(of 47 reads)              | 100%<br>(of 68 reads)                                                                                       | 49%<br>(South Asian)                |
|       | c.4987-68A>G                 | intron      | SNV          | –                 | –                | normal            | benign (!)             | <10        | 100%<br>(of 67 reads)              | 100%<br>(of 104 reads)                                                                                      | 49%<br>(South Asian)                |
|       | c.5074+65G>A                 | intron      | SNV          | –                 | –                | normal            | benign                 | <10        | 100%<br>(of 85 reads)              | 100%<br>(of 138 reads)                                                                                      | 46%<br>(South Asian)                |
|       | c.5152+66G>A                 | intron      | SNV          | –                 | –                | normal            | benign                 | 11         | 100%<br>(of 74 reads)              | 100%<br>(of 85 reads)                                                                                       | 49%<br>(South Asian)                |
| BRCA2 | c.4965C>G                    | CDS         | SNV          | p.Y1655*          | stop gain        | loss              | pathogenic             | 33         | 100%<br>(of 64 reads)              |  100%<br>(of 78 reads) | 0.008%<br>(European)                |
|       | c.4964A>T                    | CDS         | SNV          | p.Y1655F          | missense         | normal            | uncertain significance | <10        | 34%<br>(of 64 reads)               |  94%<br>(of 79 reads)  | 0%                                  |
|       | c.3807T>C                    | CDS         | SNV          | p.V1269V          | synonymous       | normal            | benign                 | <10        | 100%<br>(of 56 reads)              | 100%<br>(of 81 reads)                                                                                       | 19%<br>(African)                    |
|       | c.4563A>G                    | CDS         | SNV          | p.L1521L          | synonymous       | normal            | benign                 | <10        | 100%<br>(of 77 reads)              | 100%<br>(of 105 reads)                                                                                      | 100%<br>(Jewish)                    |

| Gene  | Mutation      | Gene region | Variant type | Amino acid change | Type of mutation | Functional impact | Computed pathogenicity | CADD score | Allele fraction [% of total reads] |                               | Maximal population allele frequency |
|-------|---------------|-------------|--------------|-------------------|------------------|-------------------|------------------------|------------|------------------------------------|-------------------------------|-------------------------------------|
|       |               |             |              |                   |                  |                   |                        |            | PEO1                               | PEO1-OR                       |                                     |
|       | c.6513G>C     | CDS         | SNV          | p.V2171V          | synonymous       | normal            | benign                 | <10        | <b>100%</b><br>(of 88 reads)       | <b>100%</b><br>(of 84 reads)  | 100%<br>(Jewish)                    |
|       | c.7397T>C     | CDS         | SNV          | p.V2466A          | missense         | normal            | benign                 | <10        | <b>100%</b><br>(of 67 reads)       | <b>100%</b><br>(of 83 reads)  | 100%<br>(Jewish)                    |
|       | c.*105A>C     | 3' UTR      | SNV          | –                 | –                | normal            | benign                 | <10        | <b>100%</b><br>(of 30 reads)       | <b>100%</b><br>(of 37 reads)  | 23%<br>(South Asian)                |
|       | c.793+98G>A   | intron      | SNV          | –                 | –                | normal            | benign                 | <10        | <b>100%</b><br>(of 49 reads)       | <b>100%</b><br>(of 48 reads)  | 100%<br>(Jewish)                    |
|       | c.6938-120T>C | intron      | SNV          | –                 | –                | normal            | benign                 | <10        | <b>100% (LQ)</b><br>(of 16 reads)  | <b>100%</b><br>(of 21 reads)  | 100%<br>(Jewish)                    |
| PARP1 | c.2285T>C     | CDS         | SNV          | p.V762A           | missense         | loss              | benign (!)             | 27         | <b>100%</b><br>(of 49 reads)       | <b>100%</b><br>(of 36 reads)  | 43%<br>(East Asian)                 |
|       | c.243C>T      | CDS         | SNV          | p.D81D            | synonymous       | normal            | benign                 | 12         | <b>100%</b><br>(of 106 reads)      | <b>100%</b><br>(of 127 reads) | 43%<br>(East Asian)                 |
|       | c.852T>C      | CDS         | SNV          | p.A284A           | synonymous       | normal            | benign                 | <10        | <b>100%</b><br>(of 56 reads)       | <b>100%</b><br>(of 52 reads)  | 81%<br>(East Asian)                 |
|       | c.-17G>C      | 5' UTR      | SNV          | –                 | –                | normal            | benign                 | 12         | <b>100%</b><br>(of 32 reads)       | <b>100%</b><br>(of 71 reads)  | 43%<br>(East Asian)                 |
|       | c.286+206G>A  | intron      | SNV          | –                 | –                | normal            | benign                 | <10        | <b>100%</b><br>(of 45 reads)       | <b>100%</b><br>(of 83 reads)  | 81%<br>(East Asian)                 |
|       | c.617+64C>A   | intron      | SNV          | –                 | –                | normal            | benign                 | <10        | <b>100%</b><br>(of 60 reads)       | <b>100%</b><br>(of 114 reads) | 43%<br>(East Asian)                 |
|       | c.617+12A>G   | intron      | SNV          | –                 | –                | normal            | benign                 | <10        | <b>100%</b><br>(of 83 reads)       | <b>100%</b><br>(of 43 reads)  | 94%<br>(East Asian)                 |
|       | c.717+87T>C   | intron      | SNV          | –                 | –                | normal            | benign                 | <10        | <b>100%</b><br>(of 47 reads)       | <b>100%</b><br>(of 106 reads) | 47%<br>(East Asian)                 |
| ATR   | c.632T>C      | CDS         | SNV          | p.M211T           | missense         | gain              | benign (!)             | 14         | <b>32%</b><br>(of 285 reads)       | <b>34%</b><br>(of 359 reads)  | 73%<br>(African)                    |
|       | c.1776T>A     | CDS         | SNV          | p.G592G           | synonymous       | normal            | benign                 | <10        | <b>31%</b><br>(of 1002 reads)      | <b>31%</b><br>(of 1133 reads) | 79%<br>(African)                    |
|       | c.1815T>C     | CDS         | SNV          | p.D605D           | synonymous       | normal            | benign (!)             | <10        | <b>32%</b><br>(of 1108 reads)      | <b>31%</b><br>(of 1274 reads) | 44%<br>(Jewish)                     |
|       | c.5208T>C     | CDS         | SNV          | p.Y1736Y          | synonymous       | normal            | benign (!)             | <10        | <b>29%</b><br>(of 172 reads)       | <b>30%</b><br>(of 185 reads)  | 45%<br>(Jewish)                     |
|       | c.7875G>A     | CDS         | SNV          | p.Q2625Q          | synonymous       | normal            | benign                 | <10        | <b>32%</b><br>(of 335 reads)       | <b>30%</b><br>(of 345 reads)  | 97%<br>(African)                    |

| Gene  | Mutation                              | Gene region | Variant type | Amino acid change | Type of mutation | Functional impact | Computed pathogenicity | CADD score | Allele fraction [% of total reads] |                                                                                                                 | Maximal population allele frequency |
|-------|---------------------------------------|-------------|--------------|-------------------|------------------|-------------------|------------------------|------------|------------------------------------|-----------------------------------------------------------------------------------------------------------------|-------------------------------------|
|       |                                       |             |              |                   |                  |                   |                        |            | PEO1                               | PEO1-OR                                                                                                         |                                     |
|       | c.1885+97_1885+100 delATTT            | intron      | deletion     | –                 | –                | normal            | benign                 | <10        | 32%<br>(of 462 reads)              |  32%<br>(of 532 reads)       | 44%<br>(Jewish)                     |
|       | c.2341+185G>A                         | intron      | SNV          | –                 | –                | normal            | benign                 | <10        | 43%<br>(of 444 reads)              |  39%<br>(of 322 reads)       | 48%<br>(African)                    |
|       | c.3357+128G>A                         | intron      | SNV          | –                 | –                | normal            | benign                 | <10        | 38%<br>(of 48 reads)               |  34%<br>(of 53 reads)        | 24%<br>(Jewish)                     |
|       | c.4852+39delT                         | intron      | deletion     | –                 | –                | normal            | uncertain significance | <10        | 41%<br>(of 87 reads)               |  <b>absent</b>               | 0.3%<br>(South Asian)               |
|       | c.5288+130G>A                         | intron      | SNV          | –                 | –                | normal            | benign                 | <10        | 31%<br>(of 62 reads)               |  29%<br>(of 75 reads)        | 45%<br>(Jewish)                     |
|       | c.5898+25T>G                          | intron      | SNV          | –                 | –                | normal            | benign                 | <10        | 75%<br>(of 32 reads)               |  85%<br>(of 34 reads)        | 79%<br>(African)                    |
|       | c.5898+82delA                         | intron      | deletion     | –                 | –                | normal            | benign                 | <10        | 100%<br>(of 19 reads)              |  100%<br>(of 22 reads)       | 71%<br>(African)                    |
|       | c.5898+67_5898+79 delTATATATATATAT    | intron      | deletion     | –                 | –                | normal            | benign                 | <10        | 100%<br>(of 19 reads)              |  59%<br>(of 17 reads)        | 39%<br>(East Asian)                 |
|       | c.5898+65_5898+79 delTATATATATATATA T | intron      | deletion     | –                 | –                | normal            | benign                 | <10        | <b>absent</b>                      |  41%<br>(of 17 reads)        | 5%<br>(Jewish)                      |
|       | c.5898+54A>G                          | intron      | SNV          | –                 | –                | normal            | benign                 | <10        | 100%<br>(of 18 reads)              |  62% (LQ)<br>(of 21 reads)   | 30%<br>(African)                    |
|       | c.5898+52A>G                          | intron      | SNV          | –                 | –                | normal            | likely benign          | <10        | <b>absent</b>                      |  24%<br>(of 21 reads)       | 3%<br>(Jewish)                      |
|       | c.1171-58A>C                          | intron      | SNV          | –                 | –                | normal            | benign                 | 10         | 64%<br>(of 70 reads)               |  67%<br>(of 101 reads)     | 6%<br>(European)                    |
|       | c.2342-175A>G                         | intron      | SNV          | –                 | –                | normal            | benign                 | <10        | 33%<br>(of 18 reads)               |  28% (LQ)<br>(of 29 reads) | 44%<br>(Jewish)                     |
|       | c.2634-37_2634-36dupGT                | intron      | insertion    | –                 | –                | normal            | benign                 | <10        | 89%<br>(of 142 reads)              |  86%<br>(of 170 reads)     | 42%<br>(European)                   |
|       | c.2634-74C>T                          | intron      | SNV          | –                 | –                | normal            | benign                 | <10        | 34%<br>(of 156 reads)              |  34%<br>(of 217 reads)     | 79%<br>(African)                    |
| CHEK1 | c.1411A>G                             | CDS         | SNV          | p.I471V           | missense         | gain              | benign                 | 14         | 100%<br>(of 105 reads)             |  100%<br>(of 105 reads)    | 99.98%<br>(East Asian)              |
|       | c.*28-3033C>G                         | 3' UTR      | SNV          | –                 | –                | normal            | benign                 | <10        | 53%<br>(of 17 reads)               |  59% (LQ)<br>(of 22 reads) | 42%<br>(South Asian)                |
|       | c.66-36G>T                            | intron      | SNV          | –                 | –                | normal            | benign                 | <10        | 52%<br>(of 79 reads)               |  57%<br>(of 94 reads)      | 42%<br>(East Asian)                 |

| Gene    | Mutation                  | Gene region | Variant type | Amino acid change | Type of mutation | Functional impact | Computed pathogenicity | CADD score | Allele fraction<br>[% of total reads] |                                                                                       | Maximal population allele frequency |                       |
|---------|---------------------------|-------------|--------------|-------------------|------------------|-------------------|------------------------|------------|---------------------------------------|---------------------------------------------------------------------------------------|-------------------------------------|-----------------------|
|         |                           |             |              |                   |                  |                   |                        |            | PEO1                                  | PEO1-OR                                                                               |                                     |                       |
| ABCB1   | c.1101+111T>A             | intron      | SNV          | –                 | –                | normal            | benign                 | <10        | 45%<br>(of 91 reads)                  |    | 51%<br>(of 92 reads)                | 42%<br>(East Asian)   |
|         | c.1233+35G>A              | intron      | SNV          | –                 | –                | normal            | benign                 | <10        | 52%<br>(of 126 reads)                 |    | 42%<br>(of 132 reads)               | 57%<br>(Latino)       |
|         | c.210A>G                  | CDS         | SNV          | p.G70G            | synonymous       | normal            | benign                 | <10        | 100%<br>(of 109 reads)                |    | 100%<br>(of 100 reads)              | 100%<br>(East Asian)  |
|         | c.530+139C>T              | intron      | SNV          | –                 | –                | normal            | benign                 | <10        | 100%<br>(of 24 reads)                 |    | 100%<br>(of 39 reads)               | 64%<br>(East Asian)   |
| RAD51   | c.645-108delA             | intron      | deletion     | –                 | –                | normal            | uncertain significance | –          | absent                                |    | 37%<br>(of 57 reads)                | 0%                    |
|         | c.645-110_645-108delAAA   | intron      | deletion     | –                 | –                | normal            | likely benign          | <10        | absent                                |    | 54%<br>(of 57 reads)                | 2.8%<br>(African)     |
|         | c.225+190delT             | intron      | deletion     | –                 | –                | normal            | benign                 | <10        | 86%<br>(of 69 reads)                  |    | 100%<br>(of 400 reads)              | 64%<br>(East Asian)   |
|         | c.226-70T>A               | intron      | SNV          | –                 | –                | normal            | benign                 | <10        | 68%<br>(of 79 reads)                  |    | 55%<br>(of 89 reads)                | 36%<br>(European)     |
|         | c.226-33T>G               | intron      | SNV          | –                 | –                | normal            | benign                 | 11         | 26%<br>(of 109 reads)                 |    | 38%<br>(of 118 reads)               | 67%<br>(East Asian)   |
| H2AX    | c.-1420G>A                | 5' UTR      | SNV          | –                 | –                | normal            | benign                 | <10        | 53%<br>(of 19 reads)                  |    | 35% (LQ)<br>(of 34 reads)           | 64%<br>(East Asian)   |
| TP53BP1 | c.3813+58delT             | intron      | deletion     | –                 | –                | normal            | uncertain significance | <10        | 28%<br>(of 347 reads)                 |    | 26%<br>(of 415 reads)               | 0.48%<br>(Latino)     |
|         | c.1165+217delT            | intron      | deletion     | –                 | –                | normal            | likely benign          | <10        | absent                                |    | 64%<br>(of 11 reads)                | 1.6%<br>(South Asian) |
|         | c.272-49G>A               | intron      | SNV          | –                 | –                | normal            | benign                 | <10        | 100%<br>(of 165 reads)                |    | 100%<br>(of 185 reads)              | 100%<br>(Jewish)      |
| PARG    | c.1456-88_1456-87dupTA    | intron      | insertion    | –                 | –                | normal            | benign                 | <10        | 100%<br>(of 45 reads)                 |   | 100%<br>(of 70 reads)               | 59%<br>(East Asian)   |
|         | c.1663-116A>C             | intron      | SNV          | –                 | –                | normal            | benign                 | <10        | 100%<br>(of 58 reads)                 |  | 100%<br>(of 84 reads)               | 59%<br>(East Asian)   |
|         | c.1830+132_1830+133 delAG | intron      | deletion     | –                 | –                | normal            | benign                 | <10        | 20%<br>(of 35 reads)                  |  | 17%<br>(of 23 reads)                | 32%<br>(European)     |

Color scale visualizes allele frequency of each variants (red – absent or low, yellow – moderate, green – high); ! – conflicting pathogenic criteria has been computationally-applied to a single variant (at least one pathogenic and one benign criterion described in Results section); **3' UTR** – 3' untranslated region; **5' UTR** – 5' untranslated region; **CDS** – protein coding sequence; **CADD score** ranges from 1 to 99 (the higher the value the more deleterious case i.e., 10 indicates top 1% pathogenic variants, 20 indicates top 0.1% pathogenic variants); **LQ** – low quality score for the variant allele call in one sample. **Maximal population allele frequency** was obtained from The Genome Aggregation Database (gnomAD).
